# Supplementary material
Source: PubMed Central journal article supplement (PMC5610931)
Supplement: NIHMS882033-supplement-1.pdf [file NIHMS882033-supplement-1.pdf]

Table S1. Baseline<sup>a</sup> Characteristics of Included and Excluded Study Participants in the MDRD Study and AASK<sup>b</sup>

|                                          | MDRD         |              | AASK         |              |
|------------------------------------------|--------------|--------------|--------------|--------------|
|                                          | Included     | Excluded     | Included     | Excluded     |
| N                                        | 317          | 523          | 373          | 721          |
| Age, years                               | 52.1 (11.9)  | 51.5 (12.7)  | 55.8 (10.3)  | 53.6 (10.7)  |
| Male, %                                  | 64.0%        | 42.3%        | 62.2%        | 60.8%        |
| African-American, %                      | 5.1%         | 9.4%         | 100%         | 100%         |
| Body mass index, kg/m <sup>2</sup>       | 27.1 (4.2)   | 27.1 (4.6)   | 30.5 (6.6)   | 30.6 (6.6)   |
| Systolic blood pressure, mmHg            | 130.5 (17.2) | 132.8 (17.8) | 149.3 (24.3) | 151.3 (24.4) |
| Diabetes, %                              | 4.4%         | 5.7%         | 0%           | 0%           |
| Total cholesterol, mg/dL                 | 199.3 (38.5) | 220.7 (50.5) | 210.3 (41.6) | 212.3 (47.4) |
| Baseline mGFR <sup>c</sup>               | 33.4 (11.9)  | 33.5 (12.0)  | 47.3 (13.2)  | 46.0 (13.8)  |
| Baseline eGFR <sub>Cr</sub> <sup>c</sup> | 34.3 (13.8)  | 33.7 (15.3)  | 43.8 (13.2)  | 42.4 (14.4)  |

Conversion factor for cholesterol in mg/dL to mmol/L, x0.02586

<sup>a</sup> Characteristics assessed at baseline for the original studies.

<sup>b</sup> Mean (standard deviation) for continuous variables and % for categorical variables

<sup>c</sup> mGFR and eGFR<sub>Cr</sub> reported in units of mL/min/1.73 m<sup>2</sup>

AASK, African American Study of Kidney Disease and Hypertension; eGFR, estimated glomerular filtration rate; MDRD, Modification of Diet in Renal Disease; mGFR, measured glomerular filtration rate
