# Supplementary material
Source: PubMed Central journal article supplement (PMC5610931)
Supplement: NIHMS882033-supplement-2.pdf [file NIHMS882033-supplement-2.pdf]

**Table S2.** Spearman Correlation Coefficients for Percent Change in Measured and Estimated Glomerular Filtration Rate

| <b>Modification of Diet in Renal Disease</b>                     |      |                    |                     |                     |                     |                      |
|------------------------------------------------------------------|------|--------------------|---------------------|---------------------|---------------------|----------------------|
|                                                                  | mGFR | eGFR <sub>Cr</sub> | eGFR <sub>Cys</sub> | eGFR <sub>βTP</sub> | eGFR <sub>β2M</sub> | Average of 4 markers |
| mGFR                                                             | 1    | 0.65               | 0.59                | 0.52                | 0.54                | 0.66                 |
| eGFR <sub>Cr</sub>                                               |      | 1                  | 0.73                | 0.54                | 0.64                | 0.85                 |
| eGFR <sub>Cys</sub>                                              |      |                    | 1                   | 0.67                | 0.76                | 0.92                 |
| eGFR <sub>βTP</sub>                                              |      |                    |                     | 1                   | 0.59                | 0.78                 |
| eGFR <sub>β2M</sub>                                              |      |                    |                     |                     | 1                   | 0.87                 |
| Average of 4 markers                                             |      |                    |                     |                     |                     | 1                    |
| <b>African American Study of Kidney Disease and Hypertension</b> |      |                    |                     |                     |                     |                      |
|                                                                  | mGFR | eGFR <sub>Cr</sub> | eGFR <sub>Cys</sub> | eGFR <sub>βTP</sub> | eGFR <sub>β2M</sub> | Average of 4 markers |
| mGFR                                                             | 1    | 0.52               | 0.43                | 0.34                | 0.48                | 0.54                 |
| eGFR <sub>Cr</sub>                                               |      | 1                  | 0.58                | 0.35                | 0.59                | 0.77                 |
| eGFR <sub>Cys</sub>                                              |      |                    | 1                   | 0.47                | 0.77                | 0.86                 |
| eGFR <sub>βTP</sub>                                              |      |                    |                     | 1                   | 0.44                | 0.67                 |
| eGFR <sub>β2M</sub>                                              |      |                    |                     |                     | 1                   | 0.84                 |
| Average of 4 markers                                             |      |                    |                     |                     |                     | 1                    |

For all correlation coefficients,  $p < 0.001$ .
