# Supplementary material
Source: PubMed Central journal article supplement (PMC5610931)
Supplement: NIHMS882033-supplement-3.pdf [file NIHMS882033-supplement-3.pdf]

**Table S3.** Unadjusted Risk of Incident End-Stage Renal Disease and All-Cause Mortality Associated with Decline in Estimated Glomerular Filtration Rate Over a One-Year Period

| Outcome   | Filtration Marker                 | MDRD                                         |         |                                  | AASK                                         |         |                                  |
|-----------|-----------------------------------|----------------------------------------------|---------|----------------------------------|----------------------------------------------|---------|----------------------------------|
|           |                                   | IRR <sup>a</sup> (95% CI)<br>per 30% decline | P-value | P-value vs.<br>mGFR <sup>b</sup> | IRR <sup>a</sup> (95% CI)<br>per 30% decline | P-value | P-value vs.<br>mGFR <sup>b</sup> |
| ESRD      | mGFR                              | 2.53 (1.90-3.39)                             | <0.001  | --                               | 4.45 (2.80-7.06)                             | <0.001  | --                               |
|           | eGFR <sub>Cr</sub>                | 2.56 (2.04-3.22)                             | <0.001  | 0.9                              | 6.89 (4.20-11.31)                            | <0.001  | 0.1                              |
|           | eGFR <sub>Cys</sub>               | 2.12 (1.57-2.86)                             | <0.001  | 0.5                              | 2.98 (1.72-5.17)                             | <0.001  | 0.2                              |
|           | eGFR <sub>βTP</sub>               | 2.32 (1.44-3.74)                             | <0.001  | 0.8                              | 3.94 (2.27-6.87)                             | <0.001  | 0.7                              |
|           | eGFR <sub>β2M</sub>               | 2.26 (1.67-3.04)                             | <0.001  | 0.6                              | 4.26 (2.65-6.84)                             | <0.001  | 0.9                              |
|           | Average of 4 markers <sup>c</sup> | 2.81 (2.06-3.82)                             | <0.001  | 0.6                              | 8.56 (4.83-15.17)                            | <0.001  | 0.1                              |
| Mortality | mGFR                              | 1.14 (0.73-1.77)                             | 0.6     | --                               | 1.74 (0.81-3.77)                             | 0.2     | --                               |
|           | eGFR <sub>Cr</sub>                | 1.13 (0.76-1.68)                             | 0.6     | 0.6                              | 3.38 (1.51-7.57)                             | 0.003   | 0.1                              |
|           | eGFR <sub>Cys</sub>               | 1.09 (0.63-1.88)                             | 0.8     | 0.9                              | 1.28 (0.50-3.30)                             | 0.6     | 0.5                              |

|                                   |                  |      |     |                  |     |     |
|-----------------------------------|------------------|------|-----|------------------|-----|-----|
| eGFR <sub>βTP</sub>               | 1.95 (0.97-3.90) | 0.06 | 0.1 | 1.20 (0.43-3.38) | 0.7 | 0.5 |
| eGFR <sub>β2M</sub>               | 0.87 (0.53-1.43) | 0.6  | 0.3 | 1.66 (0.68-4.03) | 0.3 | 0.9 |
| Average of 4 markers <sup>c</sup> | 1.14 (0.66-1.98) | 0.7  | 0.9 | 2.34 (0.81-6.71) | 0.1 | 0.6 |

<sup>a</sup> Unadjusted IRR expressed per 30% decline in mGFR or eGFR calculated by modeling percent change in mGFR or eGFR below 0% (linear spline term with a knot at 0%).

<sup>b</sup> P-value from seemingly unrelated regression comparing IRR for the respective filtration marker vs. IRR for mGFR

<sup>c</sup> Average of 4 markers = (% Δ eGFR<sub>Cr</sub> + % Δ eGFR<sub>Cys</sub> + % Δ eGFR<sub>βTP</sub> + % Δ eGFR<sub>β2M</sub>)/4

AASK, African American Study of Kidney Disease and Hypertension; CI, confidence interval; mGFR, measured glomerular filtration rate; eGFR, estimated glomerular filtration rate; ESRD, end-stage renal disease; IRR, incidence rate ratio; MDRD, Modification of Diet in Renal Disease; mGFR, measured glomerular filtration rate
