# Supplementary material
Source: PubMed Central journal article supplement (PMC5610931)
Supplement: NIHMS882033-supplement-4.pdf [file NIHMS882033-supplement-4.pdf]

**Table S4.** Risk of Incident End-Stage Renal Disease and All-Cause Mortality Associated with Decline in Measured and Estimated Glomerular Filtration Rate Over a One-Year Period Adjusted for Proteinuria

| Outcome   | Filtration Marker                 | MDRD                                         |         |                                                | AASK                                         |         |                                                |
|-----------|-----------------------------------|----------------------------------------------|---------|------------------------------------------------|----------------------------------------------|---------|------------------------------------------------|
|           |                                   | IRR <sup>a</sup> (95% CI)<br>per 30% decline | P-value | P-value vs.<br>mGFR <sub>Cr</sub> <sup>b</sup> | IRR <sup>a</sup> (95% CI)<br>per 30% decline | P-value | P-value vs.<br>mGFR <sub>Cr</sub> <sup>b</sup> |
| ESRD      | mGFR                              | 1.86 (1.36-2.56)                             | <0.001  | --                                             | 2.60 (1.33-5.08)                             | 0.01    | --                                             |
|           | eGFR <sub>Cr</sub>                | 1.91 (1.45-2.51)                             | <0.001  | 0.9                                            | 3.50 (1.65-7.44)                             | 0.001   | 0.4                                            |
|           | eGFR <sub>Cys</sub>               | 2.23 (1.56-3.21)                             | <0.001  | 0.4                                            | 2.04 (0.82-5.07)                             | 0.1     | 0.5                                            |
|           | eGFR <sub>βTP</sub>               | 3.96 (2.32-6.74)                             | <0.001  | 0.004                                          | 4.95 (1.79-13.71)                            | 0.002   | 0.2                                            |
|           | eGFR <sub>β2M</sub>               | 2.06 (1.46-2.91)                             | <0.001  | 0.6                                            | 1.74 (0.78-3.91)                             | 0.2     | 0.4                                            |
|           | Average of 4 markers <sup>c</sup> | 2.30 (1.58-3.35)                             | <0.001  | 0.3                                            | 2.37 (0.82-6.82)                             | 0.1     | 0.9                                            |
| Mortality | mGFR                              | 1.09 (0.69-1.73)                             | 0.7     | --                                             | 0.87 (0.26-2.92)                             | 0.8     | --                                             |
|           | eGFR <sub>Cr</sub>                | 1.01 (0.67-1.55)                             | 0.9     | 0.7                                            | 1.76 (0.47-6.57)                             | 0.4     | 0.4                                            |
|           | eGFR <sub>Cys</sub>               | 1.11 (0.62-1.97)                             | 0.7     | 0.9                                            | 0.96 (0.23-4.00)                             | 0.9     | 0.9                                            |
|           | eGFR <sub>βTP</sub>               | 1.74 (0.82-3.70)                             | 0.2     | 0.2                                            | 0.76 (0.13-4.38)                             | 0.8     | 0.9                                            |
|           | eGFR <sub>β2M</sub>               | 0.92 (0.55-1.56)                             | 0.8     | 0.5                                            | 0.42 (0.08-2.24)                             | 0.3     | 0.6                                            |
|           | Average of 4 markers <sup>c</sup> | 1.01 (0.56-1.84)                             | 0.9     | 0.7                                            | 0.45 (0.06-3.27)                             | 0.4     | 0.6                                            |

<sup>a</sup> IRR expressed per 30% decline in mGFR or eGFR calculated by modeling percent change in mGFR or eGFR below 0% (linear spline term with a knot at 0%); adjusted for age, sex, race, body mass index, systolic blood pressure, diabetes, total cholesterol, randomized treatment group, study group (for MDRD only), first measurement of proteinuria, and first measurement of mGFR or eGFR for the respective marker

<sup>b</sup> P-value from seemingly unrelated regression comparing IRR for the respective filtration marker vs. IRR for mGFR

<sup>c</sup> Average of 4 markers =  $(\% \Delta \text{eGFR}_{\text{Cr}} + \% \Delta \text{eGFR}_{\text{Cys}} + \% \Delta \text{eGFR}_{\beta\text{TP}} + \% \Delta \text{eGFR}_{\beta\text{2M}})/4$

AASK, African American Study of Kidney Disease and Hypertension; CI, confidence interval; eGFR, estimated glomerular filtration rate; ESRD, end-stage renal disease; IRR, incidence rate ratio; MDRD, Modification of Diet in Renal Disease; mGFR, measured glomerular filtration rate
