# Supplementary material
Source: PubMed Central journal article supplement (PMC5610931)
Supplement: NIHMS882033-supplement-5.pdf [file NIHMS882033-supplement-5.pdf]

**Table S5.** Risk of Incident End-Stage Renal Disease and All-Cause Mortality Associated with Decline in Measured and Estimated Glomerular Filtration Rate Over a One-Year Period Adjusted for Covariates at the 24-Month Follow-up Visit

| Outcome   | Filtration Marker                 | MDRD                                         |         |                                  | AASK                                         |         |                                  |
|-----------|-----------------------------------|----------------------------------------------|---------|----------------------------------|----------------------------------------------|---------|----------------------------------|
|           |                                   | IRR <sup>a</sup> (95% CI)<br>per 30% decline | P-value | P-value vs.<br>mGFR <sup>b</sup> | IRR <sup>a</sup> (95% CI)<br>per 30% decline | P-value | P-value vs.<br>mGFR <sup>b</sup> |
| ESRD      | mGFR                              | 1.01 (0.71-1.43)                             | 0.9     | --                               | 1.20 (0.67-2.12)                             | 0.5     | --                               |
|           | eGFR <sub>Cr</sub>                | 1.21 (0.89-1.66)                             | 0.2     | 0.4                              | 1.57 (0.86-2.87)                             | 0.1     | 0.4                              |
|           | eGFR <sub>Cys</sub>               | 1.27 (0.87-1.87)                             | 0.2     | 0.4                              | 0.67 (0.36-1.26)                             | 0.2     | 0.08                             |
|           | eGFR <sub>βTP</sub>               | 1.55 (0.90-2.66)                             | 0.1     | 0.1                              | 1.40 (0.69-2.83)                             | 0.4     | 0.7                              |
|           | eGFR <sub>β2M</sub>               | 1.00 (0.67-1.47)                             | 0.9     | 0.9                              | 0.56 (0.28-1.11)                             | 0.1     | 0.03                             |
|           | Average of 4 markers <sup>c</sup> | 1.15 (0.74-1.77)                             | 0.5     | 0.6                              | 0.81 (0.36-1.78)                             | 0.6     | 0.31                             |
| Mortality | mGFR                              | 1.04 (0.63-1.72)                             | 0.9     | --                               | 1.32 (0.52-3.33)                             | 0.6     | --                               |
|           | eGFR <sub>Cr</sub>                | 0.97 (0.61-1.54)                             | 0.9     | 0.7                              | 3.05 (1.25-7.48)                             | 0.02    | 0.09                             |
|           | eGFR <sub>Cys</sub>               | 0.97 (0.55-1.74)                             | 0.9     | 0.8                              | 1.16 (0.42-3.16)                             | 0.8     | 0.8                              |
|           | eGFR <sub>βTP</sub>               | 1.68 (0.79-3.56)                             | 0.2     | 0.2                              | 1.06 (0.34-3.31)                             | 0.9     | 0.8                              |
|           | eGFR <sub>β2M</sub>               | 0.72 (0.40-1.27)                             | 0.3     | 0.1                              | 1.00 (0.35-2.85)                             | 0.9     | 0.7                              |
|           | Average of 4 markers <sup>c</sup> | 0.92 (0.49-1.73)                             | 0.8     | 0.6                              | 1.57 (0.46-5.36)                             | 0.5     | 0.8                              |

<sup>a</sup> IRR expressed per 30% decline in mGFR or eGFR calculated by modeling percent change in mGFR or eGFR below 0% (linear spline term with a knot at 0%); adjusted for age, sex, race, diabetes, randomized treatment group, study group (for MDRD only), and second measurement of body mass index, systolic blood pressure, total cholesterol, and mGFR or eGFR for the respective marker

<sup>b</sup> P-value from seemingly unrelated regression comparing IRR for the respective filtration marker vs. IRR for mGFR

<sup>c</sup> Average of 4 markers =  $(\% \Delta \text{eGFR}_{\text{Cr}} + \% \Delta \text{eGFR}_{\text{Cys}} + \% \Delta \text{eGFR}_{\beta\text{TP}} + \% \Delta \text{eGFR}_{\beta\text{2M}})/4$

AASK, African American Study of Kidney Disease and Hypertension; CI, confidence interval; mGFR, measured glomerular filtration rate; eGFR, estimated glomerular filtration rate; ESRD, end-stage renal disease; IRR, incidence rate ratio; MDRD, Modification of Diet in Renal Disease; mGFR, measured glomerular filtration rate
