# Supplementary material
Source: PubMed Central journal article supplement (PMC5610931)
Supplement: NIHMS882033-supplement-6.pdf [file NIHMS882033-supplement-6.pdf]

**Table S6.** Risk of Incident End-Stage Renal Disease Associated with Decline and Rise in Measured and Estimated Glomerular Filtration Rate Over a One-Year Period Accounting for the Competing Risk of Death

| Filtration Marker                 | MDRD                     |         | AASK                     |         |
|-----------------------------------|--------------------------|---------|--------------------------|---------|
|                                   | HR <sup>a</sup> (95% CI) | P-value | HR <sup>a</sup> (95% CI) | P-value |
|                                   | per 30% decline          |         | per 30% decline          |         |
| mGFR                              | 2.01 (1.24-3.26)         | 0.01    | 3.44 (1.90-6.22)         | <0.001  |
| eGFR <sub>Cr</sub>                | 2.01 (1.28-3.16)         | 0.002   | 4.56 (2.33-8.95)         | <0.001  |
| eGFR <sub>Cys</sub>               | 1.75 (1.02-3.02)         | 0.04    | 1.77 (0.90-3.48)         | 0.1     |
| eGFR <sub>βTP</sub>               | 1.59 (0.74-3.42)         | 0.2     | 8.27 (3.80-18.01)        | <0.001  |
| eGFR <sub>β2M</sub>               | 1.94 (1.19-3.17)         | 0.01    | 1.34 (0.67-2.66)         | 0.4     |
| Average of 4 markers <sup>c</sup> | 2.02 (1.13-3.60)         | 0.02    | 2.52 (1.06-6.02)         | 0.04    |

  

| Filtration Marker                 | MDRD                     |         | AASK                     |         |
|-----------------------------------|--------------------------|---------|--------------------------|---------|
|                                   | HR <sup>b</sup> (95% CI) | P-value | HR <sup>b</sup> (95% CI) | P-value |
|                                   | per 30% increase         |         | per 30% increase         |         |
| mGFR                              | 0.75 (0.37-1.55)         | 0.4     | 0.43 (0.19-1.01)         | 0.05    |
| eGFR <sub>Cr</sub>                | 0.49 (0.18-1.36)         | 0.2     | 0.45 (0.16-1.28)         | 0.1     |
| eGFR <sub>Cys</sub>               | 0.45 (0.21-0.97)         | 0.04    | 0.43 (0.17-1.06)         | 0.07    |
| eGFR <sub>βTP</sub>               | 0.23 (0.05-0.97)         | 0.05    | 0.64 (0.49-0.83)         | <0.001  |
| eGFR <sub>β2M</sub>               | 0.50 (0.26-0.93)         | 0.03    | 0.22 (0.08-0.59)         | 0.003   |
| Average of 4 markers <sup>c</sup> | 0.28 (0.10-0.80)         | 0.02    | 0.27 (0.08-0.97)         | 0.05    |

<sup>a</sup> HR expressed per 30% decline in mGFR or eGFR calculated by modeling percent change in mGFR or eGFR below 0% (linear spline term with a knot at 0%); adjusted for age, sex, race, body mass index, systolic blood pressure, diabetes, total cholesterol, randomized treatment

group, study group (for MDRD only), and first measurement of mGFR or eGFR for the respective filtration marker

<sup>b</sup> HR expressed per 30% increase in mGFR or eGFR calculated by modeling percent change in mGFR or eGFR above 0% (linear spline term with a knot at 0%); adjusted for age, sex, race, body mass index, systolic blood pressure, diabetes, total cholesterol, randomized treatment group, study group (for MDRD only), and first measurement of mGFR or eGFR for the respective filtration marker

<sup>c</sup> Average of 4 markers =  $(\% \Delta \text{eGFR}_{\text{Cr}} + \% \Delta \text{eGFR}_{\text{Cys}} + \% \Delta \text{eGFR}_{\beta\text{TP}} + \% \Delta \text{eGFR}_{\beta\text{2M}})/4$

AASK, African American Study of Kidney Disease and Hypertension; CI, confidence interval; eGFR, estimated glomerular filtration rate; ESRD, end-stage renal disease; HR, hazard ratio; MDRD, Modification of Diet in Renal Disease; mGFR, measured glomerular filtration rate
