# Supplementary material
Source: PubMed Central journal article supplement (PMC5610931)
Supplement: NIHMS882033-supplement-7.pdf [file NIHMS882033-supplement-7.pdf]

**Table S7.** Unadjusted Risk of Incident End-Stage Renal Disease and All-Cause Mortality Associated with Increase in Measured and Estimated Glomerular Filtration Rate Over a One-Year Period

| Outcome   | Filtration Marker                 | MDRD                                          |         |                                  | AASK                                          |         |                                  |
|-----------|-----------------------------------|-----------------------------------------------|---------|----------------------------------|-----------------------------------------------|---------|----------------------------------|
|           |                                   | IRR <sup>a</sup> (95% CI)<br>per 30% increase | P-value | P-value vs.<br>mGFR <sup>b</sup> | IRR <sup>a</sup> (95% CI)<br>per 30% increase | P-value | P-value vs.<br>mGFR <sup>b</sup> |
| ESRD      | mGFR                              | 1.23 (0.73-2.10)                              | 0.4     | --                               | 0.78 (0.32-1.87)                              | 0.6     | --                               |
|           | eGFR <sub>Cr</sub>                | 1.42 (0.93-2.19)                              | 0.1     | 0.6                              | 0.82 (0.31-2.15)                              | 0.7     | 0.9                              |
|           | eGFR <sub>Cys</sub>               | 1.17 (0.77-1.79)                              | 0.5     | 0.9                              | 0.52 (0.18-1.49)                              | 0.2     | 0.5                              |
|           | eGFR <sub>βTP</sub>               | 0.58 (0.27-1.28)                              | 0.2     | 0.07                             | 0.89 (0.46-1.69)                              | 0.7     | 0.8                              |
|           | eGFR <sub>β2M</sub>               | 1.36 (0.99-1.88)                              | 0.06    | 0.7                              | 0.86 (0.31-2.41)                              | 0.8     | 0.9                              |
|           | Average of 4 markers <sup>c</sup> | 1.40 (0.79-2.47)                              | 0.2     | 0.7                              | 0.76 (0.21-2.78)                              | 0.7     | 0.9                              |
| Mortality | mGFR                              | 1.41 (0.76-2.60)                              | 0.3     | --                               | 0.83 (0.31-2.24)                              | 0.7     | --                               |
|           | eGFR <sub>Cr</sub>                | 1.41 (0.96-2.08)                              | 0.08    | 0.9                              | 2.02 (0.92-4.40)                              | 0.08    | 0.1                              |
|           | eGFR <sub>Cys</sub>               | 1.34 (0.97-1.84)                              | 0.07    | 0.9                              | 1.00 (0.36-2.78)                              | 0.9     | 0.8                              |
|           | eGFR <sub>βTP</sub>               | 2.72 (1.22-6.04)                              | 0.01    | 0.1                              | 0.85 (0.35-2.06)                              | 0.7     | 0.9                              |
|           | eGFR <sub>β2M</sub>               | 1.33 (0.98-1.82)                              | 0.07    | 0.9                              | 1.33 (0.48-3.67)                              | 0.6     | 0.5                              |
|           | Average of 4 markers <sup>c</sup> | 1.64 (1.07-2.51)                              | 0.02    | 0.6                              | 1.37 (0.45-4.20)                              | 0.6     | 0.4                              |

<sup>a</sup> Unadjusted IRR expressed per 30% increase in mGFR or eGFR calculated by modeling percent change in mGFR or eGFR above 0% (linear spline term with a knot at 0%).

<sup>b</sup> P-value from seemingly unrelated regression comparing IRR for the respective filtration marker vs. IRR for mGFR

<sup>c</sup> Average of 4 markers =  $(\% \Delta \text{eGFR}_{\text{Cr}} + \% \Delta \text{eGFR}_{\text{Cys}} + \% \Delta \text{eGFR}_{\beta\text{TP}} + \% \Delta \text{eGFR}_{\beta\text{2M}})/4$

AASK, African American Study of Kidney Disease and Hypertension; CI, confidence interval; mGFR, measured glomerular filtration rate; eGFR, estimated glomerular filtration rate; ESRD, end-stage renal disease; IRR, incidence rate ratio; MDRD, Modification of Diet in Renal Disease; mGFR, measured glomerular filtration rate
